# Supplementary material for: Association between rheumatoid factor and metabolic syndrome in general population
Source: PubMed Central journal article supplement (PMC9641854; doi:10.1186/s13098-022-00914-w), 2022-11-08
Supplement: 13098_2022_914_MOESM1_ESM.pdf [file 13098_2022_914_MOESM1_ESM.pdf]

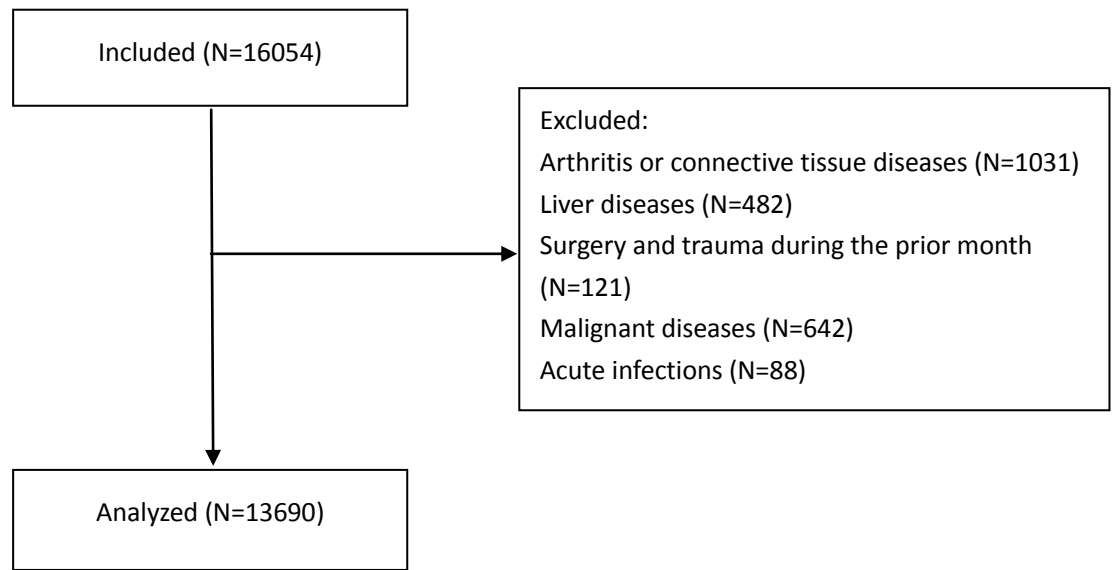

Flow diagram of participants selection
